# Supplementary material
Source: HighWire-hosted journal article supplement (https://bmjopen.bmj.com/content/7/12/e017675)
Supplement: inline-supplementary-material-1 [file inline-supplementary-material-1.pdf]

Supplementary Table 1. Full set of responses for outcome variables

| <b>If I knew my risk of breast and ovarian cancer...</b>     | <b>N (%)</b> |
|--------------------------------------------------------------|--------------|
| <b>I would try harder to have a healthy lifestyle</b>        |              |
| Strongly disagree                                            | 33 (3.9)     |
| Disagree                                                     | 50 (6.0)     |
| Neither agree/disagree                                       | 143 (17.1)   |
| Agree                                                        | 425 (50.8)   |
| Strongly agree                                               | 186 (22.2)   |
| <b>It would give me more control over my life</b>            |              |
| Strongly disagree                                            | 22 (2.6)     |
| Disagree                                                     | 135 (16.1)   |
| Neither agree/disagree                                       | 228 (27.2)   |
| Agree                                                        | 387 (46.2)   |
| Strongly agree                                               | 65 (7.8)     |
| <b>I would feel it wasn't worth making lifestyle changes</b> |              |
| Strongly disagree                                            | 169 (20.2)   |
| Disagree                                                     | 397 (47.4)   |
| Neither agree/disagree                                       | 152 (18.2)   |
| Agree                                                        | 104 (12.4)   |
| Strongly agree                                               | 15 (1.8)     |
| <b>I would feel less free to make choices in my life</b>     |              |
| Strongly disagree                                            | 112 (13.4)   |
| Disagree                                                     | 402 (48.0)   |
| Neither agree/disagree                                       | 180 (21.5)   |
| Agree                                                        | 129 (15.4)   |
| Strongly agree                                               | 14 (1.7)     |
